# Supplementary material for: Diversity of Melissococcus plutonius from Honeybee Larvae in Japan and Experimental Reproduction of European Foulbrood with Cultured Atypical Isolates
Source: PubMed Central journal article supplement (PMC3307753; doi:10.1371/journal.pone.0033708), 2012-03-19

**Figure S2. Gram staining of *M. plutonius* (DAT606) and *M. plutonius*-like (DAT571) isolates.** Bacteria were cultured under anaerobic conditions at 37°C for 5 days. Images were taken at x 1,000 magnification.

DAT606 on Medium 1

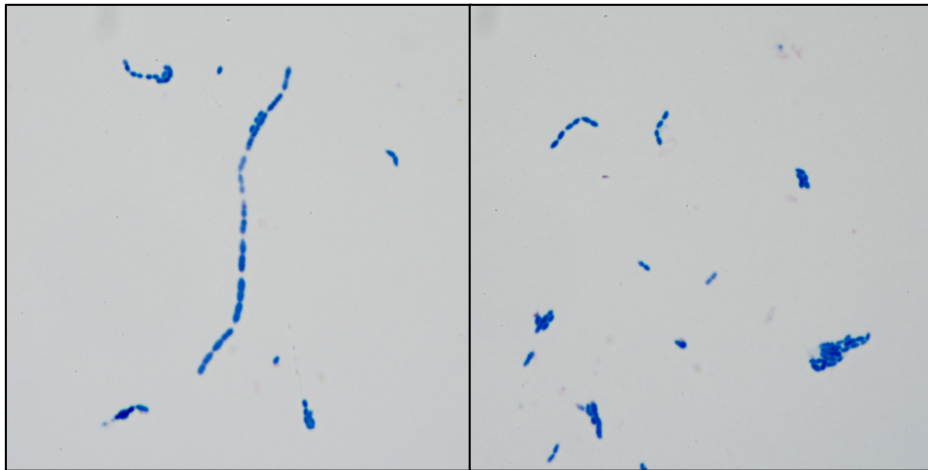

DAT571 on Medium 1

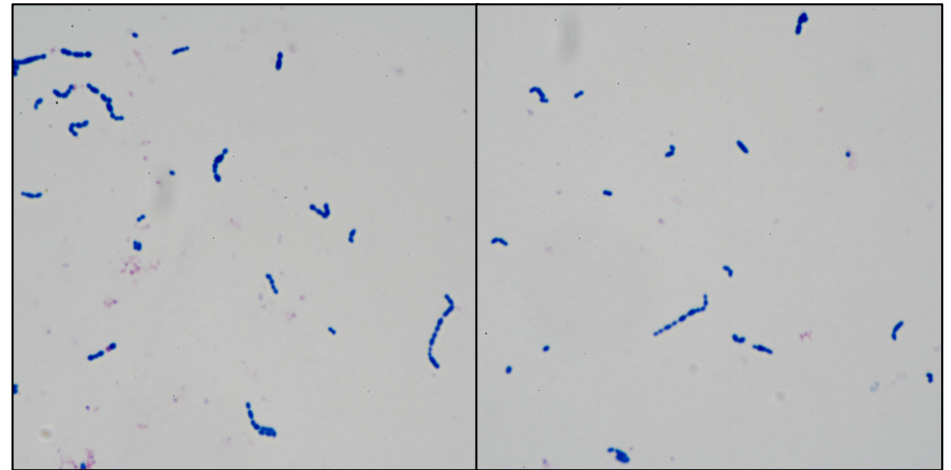

DAT606 on KSBHI agar

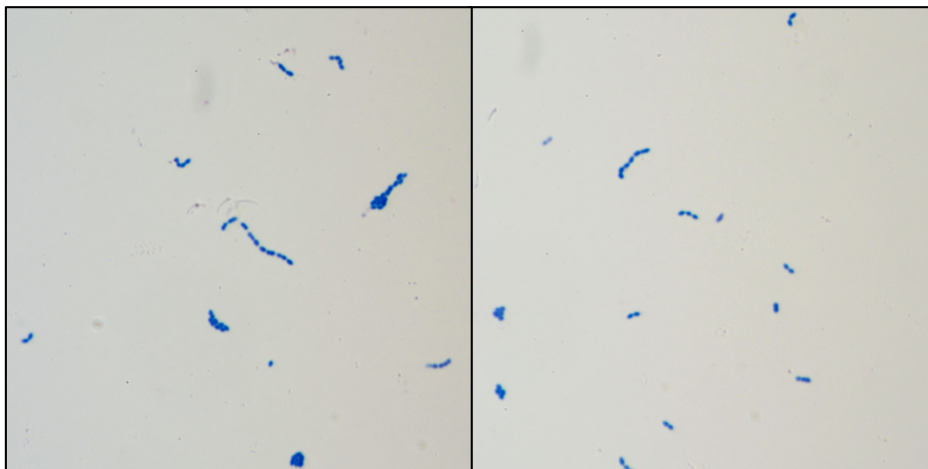

DAT571 on KSBHI agar

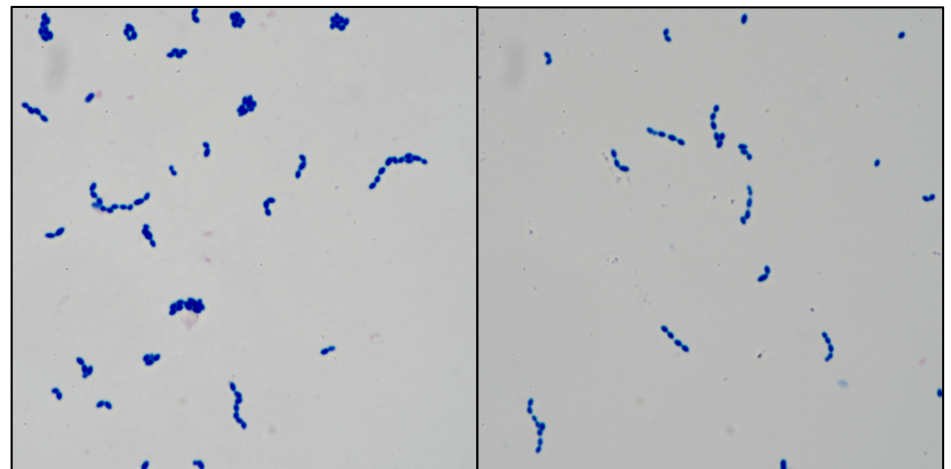

Supplement: pone.0033708.s002.pdf [file pone.0033708.s002.pdf]
