# Supplementary material for: Diversity of Melissococcus plutonius from Honeybee Larvae in Japan and Experimental Reproduction of European Foulbrood with Cultured Atypical Isolates
Source: PubMed Central journal article supplement (PMC3307753; doi:10.1371/journal.pone.0033708), 2012-03-19
Supplement: pone.0033708.s003.pdf [file pone.0033708.s003.pdf]

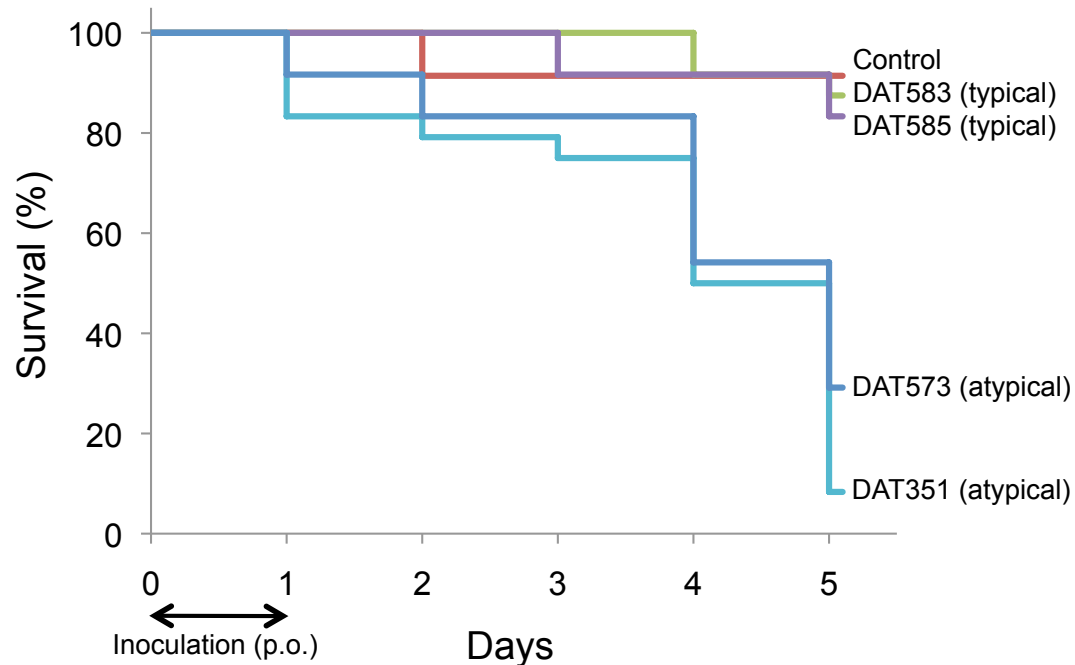

**Figure S3. Experimental Infection of Honeybee Larvae.** Survival of larvae in control and *M. plutonius* (DAT351, DAT573, DAT583 and DAT585)-inoculated groups. Larvae in inoculated groups were fed with 10  $\mu$ l artificial diet containing *M. plutonius* at a final concentration of approximately  $5 \times 10^6$  CFU/ml (approximately  $5 \times 10^4$  CFU/larva) for the first 24 h. Thirty-five (control) or twenty-four (inoculated groups) larvae were used to calculate survival rates, and survival rates of control, DAT351-inoculated, DAT573-inoculated, DAT583-inoculated and DAT585-inoculated groups at day 5 were 91.4%, 8.3%, 29.2%, 87.5% and 83.3%, respectively. No significant differences (log-rank test,  $P = 1$ ) in survival were observed between control and typical *M. plutonius* (DAT583 and DAT585)-inoculated groups, whereas significant differences (log-rank test,  $P < 0.05$ ) in survival were observed between atypical *M. plutonius* (DAT351 and DAT573)-inoculated and control/typical *M. plutonius* (DAT583 and DAT585)-inoculated groups.
