# Supplementary material for: Diversity of Melissococcus plutonius from Honeybee Larvae in Japan and Experimental Reproduction of European Foulbrood with Cultured Atypical Isolates
Source: PubMed Central journal article supplement (PMC3307753; doi:10.1371/journal.pone.0033708), 2012-03-19
Supplement: pone.0033708.s004.pdf [file pone.0033708.s004.pdf]

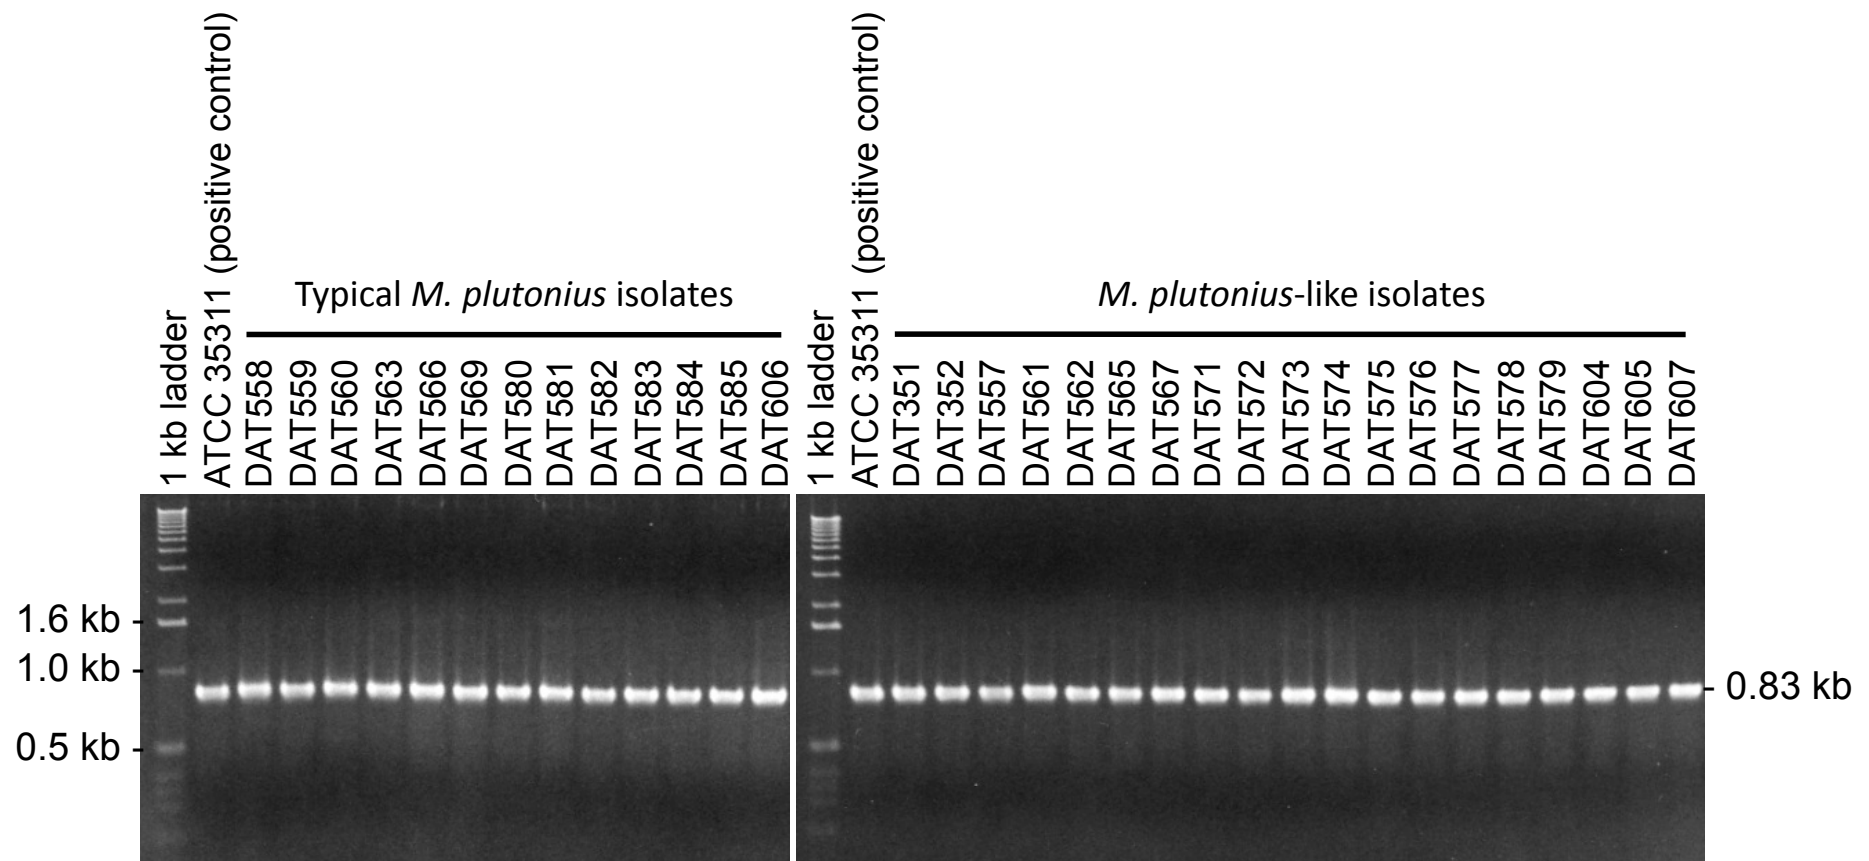

**Figure S4. *M. plutonius*-specific PCR.** *M. plutonius*-specific PCR was performed as described previously [10] using genomic DNA extracted from *M. plutonius* and *M. plutonius*-like isolates. Genomic DNA of *M. plutonius* type strain ATCC 35311 was used as a positive control. A PCR product (0.83 kb) was amplified from all strain/isolates used in this study.
